# Supplementary material for: Fire blight host-pathogen interaction: proteome profiles of Erwinia amylovora infecting apple rootstocks
Source: PubMed Central journal article supplement (PMC6076297; doi:10.1038/s41598-018-30064-x), 2018-08-03
Supplement: 41598_2018_30064_MOESM1_ESM.pdf [file 41598_2018_30064_MOESM1_ESM.pdf]

# Supplementary tables

---

## Fire blight host-pathogen interaction: proteome profiles of *Erwinia amylovora* infecting apple rootstocks

**Michelle Holtappels<sup>1,2,3</sup>, Jean-Paul Noben<sup>4</sup>, Patrick Van Dijck<sup>2,3</sup> and Roland Valcke<sup>1,\*</sup>**

<sup>1</sup>Molecular and Physical Plant Physiology, Faculty of Sciences, Hasselt University, Diepenbeek, B-3590, Belgium

<sup>2</sup>KU Leuven, Laboratory of Molecular Cell Biology VIB-KU Leuven, Center for Microbiology, Institute of Botany and Microbiology, KU Leuven, B-3001 Heverlee - Leuven, Belgium

<sup>3</sup>Department of Molecular Microbiology, VIB, B-3001 Heverlee - Leuven, Belgium

<sup>4</sup>School of Life Sciences, Biomedical Research Institute, Hasselt University and Transnational University Limburg, Hasselt, B-3590, Belgium

\*roland.valcke@uhasselt.be

**Supplementary table S2.**

Primers used in this study

| <b>Gene name</b>                                                                       | <b>Forward Primer</b> | <b>Reverse Primer</b> |
|----------------------------------------------------------------------------------------|-----------------------|-----------------------|
| <b><i>Primers for reference genes LMG2024</i></b>                                      |                       |                       |
| <i>proC</i>                                                                            | GCCGGCCTATGTGTTTATGT  | GATTGCGCTGCAAACCTGATA |
| <i>rpoS</i>                                                                            |                       |                       |
| <b><i>Primers for reference genes PFB5</i></b>                                         |                       |                       |
| <i>rpsL</i>                                                                            | AACCCGCACTGCGTAAAGT   | GGATCAGGATCACGGAGTGT  |
| <i>gyrA</i>                                                                            | CGAGCACGTTTCATAGCGTAA | TATGCAATGTCGGTCATCGT  |
| <b><i>Primers for genes related to stress</i></b>                                      |                       |                       |
| <i>clpB</i>                                                                            | GCTTTACGCTGCATGTTTCA  | GCTGCTGGATAGCTCGTTTTC |
| <i>katA</i>                                                                            | GCCAGTGATGAGCATTCTT   | TGCGTTCACGGTTGAAATTA  |
| <i>htpG</i>                                                                            | GGAAGGCCAGGAGAAGATT   | GAACCTCGATGCCTTTCTTG  |
| <i>pspA</i>                                                                            | AACAAAAGCTGACCGACCTG  | CTTCCAGCTCGCTGATTTT   |
| <i>sodA</i>                                                                            | CAGTTTGGCGATCAGCTCTT  | CACACCAAACCCATCAAGC   |
| <i>cspA</i>                                                                            | AAGTTTTCGGCTTCATCTCC  | TGACCTTCTTCCAGCGTCTT  |
| <i>dps</i>                                                                             | CGATATGCGCAAAGCTATCA  | TGGACTCGATGAACCACAGA  |
| <i>dnaK</i>                                                                            | GTTAGTCCTGGCCATCGGTA  | AGGGATTCAACTGCATCTGG  |
| <i>sspA</i>                                                                            | ATTGACCTCAACCCATACCG  | GGAAAACGTTTCGTCCAGGTA |
| <i>ibpA</i>                                                                            | GGATAACCCCGTTATTTCC   | CGCTTTACCGTTCATCCATT  |
| <b><i>Primers for genes related to the F<sub>0</sub>F<sub>1</sub>-ATP synthase</i></b> |                       |                       |
| <i>atpA</i>                                                                            | ACCGATTTGTAACCGGTCTG  | GCTATCGACAACGACGGTTT  |
| <i>atpD</i>                                                                            | TATGCCTTCTGCGGTAGGTT  | AGGTGATTGAACCGTTTTG   |
| <i>atpF</i>                                                                            | TGGGTGACGATCTTGTTACG  | CTCAGGTCATCATCGAGCAG  |

**Supplementary table S3.**

Proteins identified as higher abundant *in vitro* for both strains

| Spot number | Description                                                                         | Gene name    | LMG2024       |             | PFB5          |             |
|-------------|-------------------------------------------------------------------------------------|--------------|---------------|-------------|---------------|-------------|
|             |                                                                                     |              | Anova P-value | Fold change | Anova P-value | Fold change |
| 16          | phosphoribosylformylglycineamide synthetase                                         | <i>purL</i>  | 6,50E-04      | 8,5         | 0,002         | 4,6         |
| 44          | aconitate hydratase 2                                                               | <i>acnB</i>  | 0,007         | 4,6         | 0,001         | 2,1         |
| 45          | aconitate hydratase 2                                                               | <i>acnB</i>  | 0,006         | 3,8         | 0,011         | 2,3         |
|             | preprotein translocase subunit SecA                                                 | <i>secA</i>  |               |             |               |             |
| 73          | 5-methyltetrahydropteroyltriglutamate/homocysteine S-methyltransferase              | <i>metE</i>  | 7,95E-04      | 13,3        | 2,48E-04      | 6,8         |
| 75          | 5-methyltetrahydropteroyltriglutamate/homocysteine S-methyltransferase              | <i>metE</i>  | 0,002         | 4,8         | 0,007         | 3,1         |
| 78          | 5-methyltetrahydropteroyltriglutamate/homocysteine S-methyltransferase              | <i>metE</i>  | 4,92E-04      | 15,9        | 8,60E-05      | 9,5         |
| 110         | phosphate acetyltransferase                                                         | <i>pta</i>   | 2,28E-04      | 3,2         | 0,014         | 2           |
| 124         | dipeptidyl carboxypeptidase II                                                      | <i>dcp</i>   | 8,37E-06      | 2,4         | 0,003         | 4,1         |
| 149         | transketolase                                                                       | <i>tktA1</i> | 4,04E-06      | 3,2         | 0,004         | 2,7         |
| 150         | transketolase                                                                       | <i>tktA1</i> | 1,11E-05      | 11,7        | 3,65E-04      | 7           |
| 151         | transketolase                                                                       | <i>tktA1</i> | 1,21E-06      | 16,6        | 2,92E-04      | 6           |
| 166         | Zn-dependent oligopeptidase                                                         | <i>prlC</i>  | 0,002         | 2,9         | 0,003         | 2,3         |
| 174         | succinate dehydrogenase flavoprotein subunit                                        | <i>sdhA</i>  | 0,006         | 2,3         | 5,94E-04      | 2,5         |
| 175         | protease maturation protein                                                         | <i>ybaU</i>  | 0,002         | 2,4         | 0,007         | 2,5         |
| 274         | beta-galactosidase/beta-glucuronidase                                               | <i>lacZ1</i> | 0,012         | 2           | 0,011         | 2           |
|             | inosine-5'-monophosphate dehydrogenase                                              | <i>guaB</i>  |               |             |               |             |
| 301         | argininosuccinate lyase                                                             | <i>argH</i>  | 5,34E-05      | 4,8         | 0,005         | 2,2         |
|             | glutamyl-tRNA synthetase                                                            | <i>gltX</i>  |               |             |               |             |
| 341         | UDP-N-acetylmuramoylalanyl-D-glutamyl-2,6-diaminopimelate--D-alanyl-D-alanyl ligase | <i>murF</i>  | 1,99E-05      | 11,6        | 0,007         | 3,6         |
|             | serine hydroxymethyltransferase                                                     | <i>glyA</i>  |               |             |               |             |
| 345         | serine hydroxymethyltransferase                                                     | <i>glyA</i>  | 1,31E-04      | 7,6         | 0,005         | 3,3         |
| 372         | harpin elicitor                                                                     | <i>hrpN</i>  | 0,005         | 4,8         | 0,003         | 10,2        |

|     |                                                                                                |                   |          |      |           |     |
|-----|------------------------------------------------------------------------------------------------|-------------------|----------|------|-----------|-----|
| 385 | carboxypeptidase G2                                                                            | <i>EAMY_3587</i>  | 5,52E-04 | 2,3  | 0,012     | 2,3 |
|     | acetate kinase                                                                                 | <i>ackA</i>       |          |      |           |     |
|     | protein TolB                                                                                   | <i>tolB</i>       |          |      |           |     |
|     | morphinone reductase                                                                           | <i>nemA3</i>      |          |      |           |     |
|     | bifunctional acetylornithine delta-aminotransferase/N-succinyldiaminopimelate aminotransferase | <i>aat3</i>       |          |      |           |     |
| 388 | acetate kinase                                                                                 | <i>ackA</i>       | 3,46E-04 | 3,9  | 0,001     | 2,9 |
|     | bifunctional acetylornithine delta-aminotransferase/N-succinyldiaminopimelate aminotransferase | <i>aat3</i>       |          |      |           |     |
| 419 | phospho-2-dehydro-3-deoxyheptonate aldolase                                                    | <i>aroF</i>       | 0,001    | 7    | 0,013     | 2,8 |
| 505 | N-acetyl-gamma-glutamyl-phosphate reductase                                                    | <i>argC</i>       | 2,88E-05 | 10,9 | 2,05E-04  | 4,6 |
|     | 5,10-methylenetetrahydrofolate reductase                                                       | <i>metF</i>       |          |      |           |     |
| 532 | iron ABC transporter substrate-binding protein                                                 | <i>sitA</i>       | 2,63E-05 | 11,1 | 1,20E-040 | 6,6 |
| 546 | flagellin, filament structural protein FliC                                                    | <i>fliC1</i>      | 5,05E-05 | 10,1 | 0,007     | 2,5 |
|     | 2,3,4,5-tetrahydropyridine-2,6-carboxylate N-succinyltransferase                               | <i>dapD</i>       |          |      |           |     |
| 612 | putative ABC transport system, periplasmic component                                           | <i>EAIL5_0767</i> | 9,80E-05 | 3,6  | 0,013     | 2,5 |
| 619 | glutaredoxin-2                                                                                 | <i>grxB</i>       | 1,16E-06 | 4,6  | 0,012     | 2,6 |
|     | hypothetical protein EAMY_1021                                                                 | <i>EAMY_1021</i>  |          |      |           |     |

**Supplementary table S4.**

Proteins identified as higher abundant *in planta* for both strains

| Spot number | Description                                                 | Gene name        | LMG2024       |             | PFBS          |             |
|-------------|-------------------------------------------------------------|------------------|---------------|-------------|---------------|-------------|
|             |                                                             |                  | Anova P-value | Fold change | Anova P-value | Fold change |
| 219         | oligopeptide ABC transporter substrate-binding protein OppA | <i>oppA1</i>     | 4,62E-04      | 6,7         | 0,009         | 3           |
| 220         | acetolactate synthase large subunit                         | <i>alsS</i>      | 0,001         | 3,4         | 0,006         | 2,8         |
|             | catalase                                                    | <i>katA</i>      |               |             |               |             |
| 258         | ABC transporter substrate-binding protein                   | <i>dppA3</i>     | 0,001         | 7,9         | 0,013         | 2,9         |
| 313         | 6-phosphogluconate dehydrogenase                            | <i>metK</i>      | 0,01          | 2           | 0,014         | 3,3         |
| 425         | DNA-directed RNA polymerase subunit alpha                   | <i>eno</i>       | 0,004         | 3,2         | 0,007         | 4,7         |
|             | hypothetical protein EAMY_2128                              | <i>gnd</i>       |               |             |               |             |
|             | phosphoglycerate kinase                                     | <i>rpoA</i>      |               |             |               |             |
| 457         | transaldolase A                                             | <i>ycdO</i>      | 6,59E-04      | 3,1         | 8,13E-04      | 3,7         |
|             | glyceraldehyde-3-phosphate dehydrogenase                    | <i>pgk</i>       |               |             |               |             |
| 458         | oxidoreductase                                              | <i>mocA</i>      | 7,46E-04      | 3,5         | 6,13E-04      | 3,1         |
|             | glyceraldehyde 3-phosphate dehydrogenase A                  | <i>gapA</i>      |               |             |               |             |
| 461         | oxidoreductase                                              | <i>mocA</i>      | 3,96E-04      | 2,4         | 0,008         | 2,1         |
|             | D-arabinose 5-phosphate isomerase                           | <i>yrbH</i>      |               |             |               |             |
|             | glyceraldehyde 3-phosphate dehydrogenase A                  | <i>gapA</i>      |               |             |               |             |
| 462         | FOF1 ATP synthase subunit beta                              | <i>atpD</i>      | 2,07E-04      | 4,1         | 0,002         | 5,3         |
| 464         | ABC transporter substrate-binding protein                   | <i>dppA3</i>     | 2,79E-05      | 5,5         | 7,40E-05      | 4,3         |
| 549         | septum site-determining protein minD                        | <i>minD</i>      | 0,001         | 2,5         | 0,004         | 2,2         |
|             | FeS assembly ATPase SufC                                    | <i>sufC</i>      |               |             |               |             |
|             | enolase                                                     | <i>eno</i>       |               |             |               |             |
| 570         | septum site-determining protein minD                        | <i>minD</i>      | 0,001         | 3,6         | 1,91E-04      | 3,5         |
|             | elongation factor EF-P                                      | <i>yeiP</i>      |               |             |               |             |
|             | FOF1 ATP synthase subunit beta                              | <i>atpD</i>      |               |             |               |             |
| 572         | sorbitol-6-phosphate dehydrogenase                          | <i>srlD</i>      | 0,002         | 2,3         | 0,005         | 3,7         |
| 579         | sorbitol-6-phosphate dehydrogenase                          | <i>srlD</i>      | 3,06E-05      | 8,2         | 3,35E-06      | 4           |
| 616         | NAD(P)H-flavin reductase                                    | <i>ubiB</i>      | 1,57E-06      | 22,5        | 4,90E-04      | 6,3         |
|             | hypothetical protein EAMY_1021                              | <i>EAMY_1021</i> |               |             |               |             |
|             | phage shock protein A                                       | <i>pspA</i>      |               |             |               |             |

|     |                                                         |                   |          |      |          |     |
|-----|---------------------------------------------------------|-------------------|----------|------|----------|-----|
| 631 | dethiobiotin synthetase                                 | <i>ynfK</i>       | 0,003    | 3    | 0,008    | 2,7 |
| 647 | hypothetical protein EAM_0402                           | <i>EAM_0402</i>   | 0,003    | 2    | 0,004    | 2,6 |
| 655 | hypothetical protein EAM_0402                           | <i>EAM_0402</i>   | 9,22E-05 | 3,1  | 0,003    | 3,3 |
|     | carbonate dehydratase                                   | <i>cynT</i>       |          |      |          |     |
| 657 | 3-oxoacyl-ACP reductase                                 | <i>fabG</i>       | 1,64E-05 | 4,4  | 0,01     | 2,3 |
|     | superoxide dismutase, manganese                         | <i>sodA</i>       |          |      |          |     |
| 668 | alkyl hydroperoxide reductase subunit C                 | <i>ahpC</i>       | 1,70E-04 | 5,3  | 0,002    | 4,7 |
| 688 | peptide deformylase                                     | <i>def</i>        | 0,015    | 3,6  | 0,002    | 2,5 |
| 694 | ribosome recycling factor                               | <i>frr</i>        | 0,003    | 2,2  | 0,006    | 2,5 |
|     | hypothetical protein EAMY_0970                          | <i>yajQ</i>       |          |      |          |     |
| 719 | hypothetical protein EAMY_1435                          | <i>yceI</i>       | 0,007    | 5    | 0,007    | 3,6 |
| 724 | shikimate kinase I                                      | <i>aroK</i>       | 9,93E-05 | 6    | 3,45E-04 | 5,5 |
|     | ATP synthase subunit B protein                          | <i>atpF</i>       |          |      |          |     |
|     | DNA protection during starvation protein                | <i>dps</i>        |          |      |          |     |
| 730 | DNA protection during starvation protein                | <i>dps</i>        | 0,003    | 4,1  | 0,002    | 4,3 |
| 733 | putative type VI secretion system, effector protein hcp | <i>EAIL5_3094</i> | 0,008    | 2,7  | 0,006    | 2,5 |
|     | DNA protection during starvation protein                | <i>dps</i>        |          |      |          |     |
| 753 | bacterioferritin comigratory protein                    | <i>bcp</i>        | 0,001    | 13,2 | 0,008    | 8,5 |
| 756 | 50S ribosomal protein L9                                | <i>rplI</i>       | 0,009    | 3,2  | 0,011    | 2,4 |
| 767 | DNA-binding protein H-NS                                | <i>hns</i>        | 0,007    | 3,7  | 0,001    | 4,1 |
|     | 30S ribosomal protein S6                                | <i>rpsF</i>       |          |      |          |     |
| 768 | DNA protection during starvation protein                | <i>dps</i>        | 7,45E-04 | 3,1  | 5,29E-04 | 3,2 |
|     | global DNA-binding transcriptional dual regulator H-NS  | <i>hns</i>        |          |      |          |     |
|     | 30S ribosomal protein S6                                | <i>rpsF</i>       |          |      |          |     |
| 774 | 30S ribosomal protein S6                                | <i>rpsF</i>       | 0,002    | 4,7  | 0,011    | 2,7 |
| 775 | 30S ribosomal protein S6                                | <i>rpsF</i>       | 0,01     | 3    | 0,003    | 2,9 |
|     | hypothetical protein EAMY_1829                          | <i>EAMY_1829</i>  |          |      |          |     |
